# Supplementary material for: Interelemental osteohistological variation in Massospondylus carinatus and its implications for locomotion
Source: PeerJ. 2022 Sep 23;10:e13918. doi: 10.7717/peerj.13918 (PMC9512004; doi:10.7717/peerj.13918)
Supplement: Supplemental Information 5 [file peerj-10-13918-s005.xlsx]

## Sheet: Sheet1
Specimen number	Element	Vascularisation surface area (um2)	Proportional vascularisation	Average vascularisation (%)
BP/1/5253	humerus	374215	0.335625	27.1052
BP/1/5253	humerus	286290	0.256767	27.1052
BP/1/5253	humerus	286290	0.256767	27.1052
BP/1/5253	humerus	225359	0.20212	27.1052
BP/1/5253	humerus	252537	0.226495	27.1052
BP/1/5253	humerus	295704	0.26521	27.1052
BP/1/5253	humerus	334676	0.300164	27.1052
BP/1/5253	humerus	312171	0.279979	27.1052
BP/1/5253	humerus	344969	0.309395	27.1052
BP/1/5253	humerus	309957	0.277994	27.1052
BP/1/5253	femur	225715	0.202439	0.248963
BP/1/5253	femur	282611	0.253468	0.248963
BP/1/5253	femur	347509	0.311673	0.248963
BP/1/5253	femur	349910	0.313827	0.248963
BP/1/5253	femur	251744	0.225784	0.248963
BP/1/5253	femur	251856	0.225884	0.248963
BP/1/5253	femur	268498	0.24081	0.248963
BP/1/5253	femur	237434	0.212949	0.248963
BP/1/5253	femur	265651	0.238257	0.248963
BP/1/5253	femur	294957	0.26454	0.248963
BP/1/4376	radius	273352	0.245163	19.3227
BP/1/4376	radius	238181	0.213619	19.3227
BP/1/4376	radius	186860	0.167591	19.3227
BP/1/4376	radius	189919	0.170334	19.3227
BP/1/4376	radius	188906	0.169426	19.3227
BP/1/4376	tibia	212719	0.190783	21.4697
BP/1/4376	tibia	248154	0.222564	21.4697
BP/1/4376	tibia	285220	0.255808	21.4697
BP/1/4376	tibia	240097	0.215338	21.4697
BP/1/4376	tibia	210724	0.188994	21.4697
BP/1/4266b	humerus	154390	0.138469	25.3387
BP/1/4266b	humerus	304188	0.272819	25.3387
BP/1/4266b	humerus	296068	0.265537	25.3387
BP/1/4266b	humerus	270168	0.242308	25.3387
BP/1/4266b	humerus	372562	0.334143	25.3387
BP/1/4266b	humerus	321068	0.287959	25.3387
BP/1/4266b	humerus	300991	0.269952	25.3387
BP/1/4266b	humerus	240733	0.215908	25.3387
BP/1/4266b	femur	112503	0.100901	7.73415
BP/1/4266b	femur	112388	0.100798	7.73415
BP/1/4266b	femur	73188	0.0656407	7.73415
BP/1/4266b	femur	54489	0.04887	7.73415
BP/1/4266b	femur	78603	0.0704973	7.73415
BP/1/5238	femur	149533	0.134113	10.2171
BP/1/5238	femur	89903.5	0.0806324	10.2171
BP/1/5238	femur	97089.1	0.0870771	10.2171
BP/1/5238	femur	105694	0.0947947	10.2171
BP/1/5238	femur	119851	0.107492	10.2171
BP/1/5238	femur	110674	0.0992608	10.2171
BP/1/5238	femur	108246	0.097083	10.2171
BP/1/5238	femur	98825.3	0.0886342	10.2171
BP/1/5238	femur	127148	0.114036	10.2171
BP/1/5238	femur	132217	0.118582	10.2171
BP/1/5238	tibia	301250	0.270184	9.63896
BP/1/5238	tibia	113189	0.101516	9.63896
BP/1/5238	tibia	85121.4	0.0763435	9.63896
BP/1/5238	tibia	76995.1	0.0690552	9.63896
BP/1/5238	tibia	114731	0.1029	9.63896
BP/1/5238	tibia	147490	0.13228	9.63896
BP/1/5238	tibia	126230	0.113213	9.63896
BP/1/5238	tibia	106618	0.0956231	9.63896
BP/1/5238	tibia	111379	0.0998935	9.63896
BP/1/5238	tibia	85498.9	0.076682	9.63896
BP/1/5143	femur	67964.6	0.060956	5.76272
BP/1/5143	femur	51710.8	0.0463782	5.76272
BP/1/5143	femur	45278.1	0.0406089	5.76272
BP/1/5143	femur	46422.9	0.0416356	5.76272
BP/1/5143	femur	95399.2	0.0855615	5.76272
BP/1/5143	femur	97726.7	0.0876489	5.76272
BP/1/5143	femur	96846.3	0.0868593	5.76272
BP/1/5143	femur	50759.2	0.0455248	5.76272
BP/1/5143	femur	37770.9	0.0338759	5.76272
BP/1/5143	femur	52653.1	0.0472234	5.76272
BP/1/4267	femur	140179	0.125723	12.5274
BP/1/4267	femur	141726	0.127111	12.5274
BP/1/4267	femur	132667	0.118987	12.5274
BP/1/4267	femur	139066	0.124726	12.5274
BP/1/4267	femur	133845	0.120042	12.5274
BP/1/4267	femur	154351	0.138434	12.5274
BP/1/4267	femur	164060	0.147142	12.5274
BP/1/4267	femur	163619	0.146746	12.5274
BP/1/4267	femur	132509	0.118844	12.5274
BP/1/4267	femur	94759.5	0.0849877	12.5274
BP/1/4751	humerus	177151	0.158883	18.8326
BP/1/4751	humerus	218210	0.195708	18.8326
BP/1/4751	humerus	155419	0.139392	18.8326
BP/1/4751	humerus	203494	0.182509	18.8326
BP/1/4751	humerus	185942	0.166767	18.8326
BP/1/4751	humerus	282991	0.253808	18.8326
BP/1/4751	humerus	181088	0.162414	18.8326
BP/1/4751	humerus	275537	0.247123	18.8326
BP/1/4751	femur	256433	0.229989	23.1549
BP/1/4751	femur	240278	0.2155	23.1549
BP/1/4751	femur	249058	0.223375	23.1549
BP/1/4751	femur	242128	0.217159	23.1549
BP/1/4751	femur	246049	0.220676	23.1549
BP/1/4751	femur	198805	0.178304	23.1549
BP/1/4751	femur	239025	0.214376	23.1549
BP/1/4751	femur	344884	0.309319	23.1549
BP/1/4751	femur	291003	0.260994	23.1549
BP/1/4751	femur	274056	0.245795	23.1549
BP/1/4751	tibia	286592	0.257038	26.1901
BP/1/4751	tibia	301915	0.270781	26.1901
BP/1/4751	tibia	344643	0.309103	26.1901
BP/1/4751	tibia	343411	0.307998	26.1901
BP/1/4751	tibia	311955	0.279786	26.1901
BP/1/4751	tibia	159227	0.142807	26.1901
BP/1/4751	tibia	301176	0.270118	26.1901
BP/1/4751	tibia	278672	0.249935	26.1901
BP/1/4751	tibia	303641	0.272329	26.1901
BP/1/4751	tibia	288909	0.259116	26.1901
BP/1/4747	femur	205434	0.184249	16.8072
BP/1/4747	femur	186042	0.166857	16.8072
BP/1/4747	femur	219888	0.197213	16.8072
BP/1/4747	femur	216506	0.194179	16.8072
BP/1/4747	femur	189045	0.16955	16.8072
BP/1/4747	femur	161672	0.145	16.8072
BP/1/4747	femur	173919	0.155984	16.8072
BP/1/4747	femur	146665	0.13154	16.8072
BP/1/4777	humerus	112513	0.100911	8.11932
BP/1/4777	humerus	94755.4	0.084984	8.11932
BP/1/4777	humerus	91178.3	0.0817758	8.11932
BP/1/4777	humerus	90594.5	0.0812522	8.11932
BP/1/4777	humerus	101709	0.0912203	8.11932
BP/1/4777	humerus	74752.4	0.0670437	8.11932
BP/1/4777	humerus	101613	0.0911348	8.11932
BP/1/4777	humerus	72218.7	0.0647714	8.11932
BP/1/4777	humerus	75423.4	0.0676456	8.11932
BP/1/4693	ulna	74907.6	0.0671829	12.5884
BP/1/4693	ulna	77354.6	0.0693776	12.5884
BP/1/4693	ulna	101216	0.0907788	12.5884
BP/1/4693	ulna	504896	0.45283	12.5884
BP/1/4693	ulna	124345	0.111522	12.5884
BP/1/4693	ulna	95120.2	0.0853112	12.5884
BP/1/4693	ulna	70637.6	0.0633533	12.5884
BP/1/4693	ulna	74387.1	0.0667162	12.5884
BP/1/4693	femur	112165	0.100598	9.97279
BP/1/4693	femur	138682	0.124381	9.97279
BP/1/4693	femur	95739.7	0.0858668	9.97279
BP/1/4693	femur	106489	0.095508	9.97279
BP/1/4693	femur	107482	0.0963982	9.97279
BP/1/4693	femur	183101	0.164219	9.97279
BP/1/4693	femur	90099.4	0.0808082	9.97279
BP/1/4693	femur	71581.5	0.0641998	9.97279
BP/1/4693	femur	95410.2	0.0855713	9.97279
NMQR3055	humerus	3874933	0.139014	18.0178
NMQR3056	humerus	6319073	0.226697	18.0178
NMQR3057	humerus	4791077	0.17188	18.0178
NMQR3058	humerus	5104347	0.183119	18.0178
NMQR3059	femur	241790	0.216856	22.5982
NMQR3060	femur	331851	0.29763	22.5982
NMQR3061	femur	197232	0.176893	22.5982
NMQR3062	femur	173513	0.15562	22.5982
NMQR3063	femur	175309	0.157231	22.5982
NMQR3064	femur	204790	0.183672	22.5982
NMQR3065	femur	318461	0.285621	22.5982
NMQR3066	femur	291002	0.260993	22.5982
NMQR3067	femur	288808	0.259026	22.5982
NMQR3068	femur	296894	0.266278	22.5982
NMQR3069	tibia	189541	0.169995	24.0305
NMQR3070	tibia	297581	0.266894	24.0305
NMQR3071	tibia	356891	0.320088	24.0305
NMQR3072	tibia	370673	0.332448	24.0305
NMQR3073	tibia	128743	0.115467	24.0305
NMQR3074	tibia	249749	0.223994	24.0305
NMQR3075	tibia	218525	0.19599	24.0305
NMQR3076	tibia	308420	0.276615	24.0305
NMQR3077	tibia	291290	0.261252	24.0305
BP/1/5108	tibia	238412	0.213826	25.0753
BP/1/5108	tibia	239214	0.214545	25.0753
BP/1/5108	tibia	236915	0.212484	25.0753
BP/1/5108	tibia	250730	0.224875	25.0753
BP/1/5108	tibia	249134	0.223443	25.0753
BP/1/5108	tibia	326843	0.293138	25.0753
BP/1/5108	tibia	342210	0.306921	25.0753
BP/1/5108	tibia	336235	0.301562	25.0753
BP/1/5108	tibia	260821	0.233925	25.0753
BP/1/5108	tibia	315328	0.28281	25.0753
BP/1/4999	humerus	294035	0.263713	28.9135
BP/1/4999	humerus	313534	0.281202	28.9135
BP/1/4999	humerus	322654	0.289381	28.9135
BP/1/4999	humerus	289318	0.259483	28.9135
BP/1/4999	humerus	224667	0.241446	28.9135
BP/1/4999	humerus	370190	0.332015	28.9135
BP/1/4999	humerus	438650	0.393415	28.9135
BP/1/4999	humerus	281445	0.252422	28.9135
BP/1/5193	humerus	284402	0.255074	23.6795
BP/1/5193	humerus	228562	0.204992	23.6795
BP/1/5193	humerus	303726	0.272405	23.6795
BP/1/5193	humerus	340468	0.305358	23.6795
BP/1/5193	humerus	225291	0.202059	23.6795
BP/1/5193	humerus	211850	0.190003	23.6795
BP/1/5193	humerus	249362	0.223647	23.6795
BP/1/5193	humerus	237622	0.213118	23.6795
BP/1/5193	humerus	264454	0.237183	23.6795
BP/1/5193	humerus	294481	0.264113	23.6795
BP/1/5193	femur	337079	0.302318	26.9724
BP/1/5193	femur	310516	0.278495	26.9724
BP/1/5193	femur	239909	0.215169	26.9724
BP/1/5193	femur	270555	0.242654	26.9724
BP/1/5193	femur	357037	0.320219	26.9724
BP/1/5193	femur	289323	0.259487	26.9724
BP/1/4860	tibia	128702	0.11543	10.2844
BP/1/4860	tibia	189633	0.170078	10.2844
BP/1/4860	tibia	102734	0.0921395	10.2844
BP/1/4860	tibia	68608.1	0.0615331	10.2844
BP/1/4860	tibia	113450	0.10175	10.2844
BP/1/4860	tibia	85931.8	0.0770703	10.2844
BP/1/4860	tibia	93961.4	0.0842719	10.2844
BP/1/4860	tibia	134332	0.120479	10.2844
BP/1/5241	humerus	100243	0.0899058	9.31576
BP/1/5241	humerus	104206	0.0934601	9.31576
BP/1/5241	humerus	123731	0.110971	9.31576
BP/1/5241	humerus	103161	0.0925225	9.31576
BP/1/5241	humerus	90449.9	0.0811225	9.31576
BP/1/5241	humerus	105827	0.0949141	9.31576
BP/1/5241	humerus	108861	0.0976351	9.31576
BP/1/5241	humerus	126411	0.113375	9.31576
BP/1/5241	humerus	84566.2	0.0758455	9.31576
BP/1/5241	humerus	91231.9	0.0818239	9.31576
BP/1/5241	femur	308261	0.276472	17.0235
BP/1/5241	femur	125218	0.112305	17.0235
BP/1/5241	femur	128767	0.115489	17.0235
BP/1/5241	femur	204343	0.183271	17.0235
BP/1/5241	femur	198678	0.17819	17.0235
BP/1/5241	femur	146164	0.131091	17.0235
BP/1/5241	femur	165442	0.148381	17.0235
BP/1/5241	femur	220759	0.197994	17.0235
BP/1/5241	femur	233117	0.209078	17.0235
BP/1/5241	femur	167337	0.150081	17.0235
BP/1/4998	humerus	186576	0.167336	20.5455
BP/1/4998	humerus	256275	0.229847	20.5455
BP/1/4998	humerus	242082	0.217118	20.5455
BP/1/4998	humerus	189815	0.170241	20.5455
BP/1/4998	humerus	295293	0.264842	20.5455
BP/1/4998	humerus	278394	0.249685	20.5455
BP/1/4998	humerus	215424	0.193209	20.5455
BP/1/4998	humerus	198682	0.178193	20.5455
BP/1/4998	humerus	199158	0.17862	20.5455
BP/1/4998	femur	245557	0.220235	22.3127
BP/1/4998	femur	299743	0.268833	22.3127
BP/1/4998	femur	262677	0.235589	22.3127
BP/1/4998	femur	117059	0.104988	22.3127
BP/1/4998	femur	314824	0.282359	22.3127
BP/1/4998	femur	296268	0.265716	22.3127
BP/1/4998	femur	205346	0.18417	22.3127
BP/1/5005	humerus	127842	0.114659	10.5434
BP/1/5005	humerus	109211	0.0979486	10.5434
BP/1/5005	humerus	121901	0.10933	10.5434
BP/1/5005	humerus	124495	0.111656	10.5434
BP/1/5005	humerus	132918	0.119211	10.5434
BP/1/5005	humerus	109276	0.0980069	10.5434
BP/1/5005	humerus	106752	0.0957432	10.5434
BP/1/5005	humerus	93594.7	0.083943	10.5434
BP/1/5005	humerus	94840.8	0.0850606	10.5434
BP/1/5005	humerus	154739	0.138782	10.5434
BP/1/4928	tibia	132039	0.118423	8.00643
BP/1/4928	tibia	86683.7	0.0777447	8.00643
BP/1/4928	tibia	83433.8	0.0748299	8.00643
BP/1/4928	tibia	104870	0.0940555	8.00643
BP/1/4928	tibia	99036.1	0.0888233	8.00643
BP/1/4928	tibia	29557.7	0.0265096	8.00643
BP/1/5397	humerus	174568	0.156566	18.218
BP/1/5397	humerus	157612	0.141359	18.218
BP/1/5397	humerus	257925	0.231327	18.218
BP/1/5397	humerus	219243	0.196634	18.218
BP/1/5397	humerus	206287	0.185014	18.218
BP/1/6125	humerus	232548	0.208567	16.4269
BP/1/6125	humerus	203967	0.182933	16.4269
BP/1/6125	humerus	117815	0.105666	16.4269
BP/1/6125	humerus	166216	0.149076	16.4269
BP/1/6125	humerus	125426	0.112491	16.4269
BP/1/6125	humerus	61625.5	0.0552706	16.4269
BP/1/6125	humerus	201011	0.180282	16.4269
BP/1/6125	humerus	230458	0.206693	16.4269
BP/1/6125	humerus	245745	0.220403	16.4269
BP/1/6125	humerus	246759	0.221313	16.4269
BP/1/5011	humerus	93989.6	0.0842972	6.8042
BP/1/5011	humerus	83625.9	0.0750022	6.8042
BP/1/5011	humerus	67376.4	0.0604284	6.8042
BP/1/5011	humerus	55784.9	0.0500322	6.8042
BP/1/5011	humerus	78550.1	0.0704498	6.8042
